# Supplementary material for: Delayed graft function is associated with an increased rate of renal allograft rejection: A retrospective single center analysis
Source: PLOS journal article supplement (doi:10.1371/journal.pone.0199445), 2018-06-21
Supplement: S2 (10.1371/journal.pone.0199445.s002) [file journal.pone.0199445.s002]

**Table 6. Multivariate Table: HR (Model 5) for BPAR due to DGF (≥ 2 dialysis post-transplant).**

| <b>DGF defined by ≥ 2 dialysis treatments post-transplant</b> | <b>Non-DGF<br/>(n=306)</b> | <b>DGF<br/>(n=111)</b> | <b>Hazard ratio (95% CI)</b> | <b>P-value</b> |
|---------------------------------------------------------------|----------------------------|------------------------|------------------------------|----------------|
| <b>BPAR with borderline rejection</b>                         | 80<br>(26.1%)              | 41<br>(36.9%)          | 1.56 (1.03, 2.36)            | *              |
| <b>BPAR without borderline rejection</b>                      | 60<br>(20.9%)              | 28<br>(25.2%)          | 1.40 (0.85, 2.2)             | ns             |

Multivariate Table: HR (Model 5) for BPAR due to DGF (≥ 2 dialysis post-transplant)  
 Outcome by group (DGF definition ≥ 2 dialysis treatments required after transplantation)  
 \* = p< 0.05 ; \*\* = p<0.01 ; \*\*\* = p<0.001
